# Supplementary material for: Early identification of recurrence in ovarian cancer: a comparison between the ovarian cancer metastasis index and CA-125 levels
Source: PeerJ. 2018 Nov 7;6:e5912. doi: 10.7717/peerj.5912 (PMC6228545; doi:10.7717/peerj.5912)
Supplement: Table S1 [file peerj-06-5912-s002.xlsx]

## Sheet: Sheet1
Supplementary Table 1. Information of patients included in the study.
ID	Age	Menopause (0:premenopause;1:postmenopause)	Number of metastatic organs at the time of diagnosis	Number of chemotherapy cycles	Recrudescence (chemotherapy cycle)	Chemotherapeutic drugs (chemotherapy cycle)	Chemotherapy cycle with abnormal OCMI (OCMI > 0.504)	Investigation time (month)
Patient1	68	1	7	9	Recrudescence (7th)	Paclitaxel+Carboplatin (1st-6th); Docetaxel+Carboplatin (7th)	1st, 6th	12
Patient2	58	1	6	5	No recrudescence	Docetaxel+Carboplatin (1st-5th)	2nd, 3th, 4th	9.1
Patient3	54	1	9	6	No recrudescence	Docetaxel+Carboplatin (1st-6th)	No chemotherapy cycle with abnormal OCMI	6.5
Patient4	56	1	8	9	Recrudescence (7th)	Paclitaxel+Carboplatin (1st-7th); Docetaxel+Carboplatin (8th-9th)	2nd, 5th, 6th, 7th	12.6
Patient5	74	1	3	2	No recrudescence	Docetaxel+Carboplatin (1st); Paclitaxel liposome+Carboplatin (2nd)	No chemotherapy cycle with abnormal OCMI	11.4
Patient6	48	0	1	6	No recrudescence	Paclitaxel+Carboplatin (1st-6th)	No chemotherapy cycle with abnormal OCMI	11.1
Patient7	59	1	1	6	No recrudescence	Docetaxel+Carboplatin (1st-6th)	No chemotherapy cycle with abnormal OCMI	6.5
Patient8	37	0	7	10	Recrudescence (7th)	Paclitaxel+Carboplatin (1st-8th); Docetaxel+Carboplatin (9th); Paclitaxel liposome+Carboplatin (10th)	1st, 2nd	12
Patient9	53	1	7	16	Recrudescence (8th)	Paclitaxel+Carboplatin (1st-5th); Paclitaxel liposome+Carboplatin (6th); Docetaxel+Nedaplatin (7th); Paclitaxel liposome+Carboplatin (8th); Paclitaxel+Carboplatin (9th-12th); Doxorubicin Hydrochloride Liposome+Fluuronidine (13th); Docetaxel+Carboplatin (14st-16th)	1st, 12th	25.8
Patient10	56	1	8	20	Recrudescence (9th)	Paclitaxel+Carboplatin (1st-19th); Docetaxel+Carboplatin (20th)	2nd, 6th, 15th, 16th, 17th, 18th, 19th, 20th	23.5
Patient11	47	0	2	9	No recrudescence	Paclitaxel+Carboplatin (1st-7th); Docetaxel+Carboplatin (8th-9th)	No chemotherapy cycle with abnormal OCMI	20.7
Patient12	69	1	7	2	No recrudescence	Paclitaxel+Carboplatin (1st-2nd)	1st, 2nd	4.2
Patient13	57	1	3	21	Recrudescence (11th)	Paclitaxel+Carboplatin (1st-10th); Docetaxel+Carboplatin (11th); Paclitaxel liposome+Carboplatin (12th-16th); Docetaxel+Carboplatin (17th-21th)	No chemotherapy cycle with abnormal OCMI	50.1
Patient14	66	1	2	4	No recrudescence	Docetaxel+Carboplatin (1st-4th)	No chemotherapy cycle with abnormal OCMI	4.2
Patient15	44	0	0	3	No recrudescence	Docetaxel+Carboplatin (1st-3th)	No chemotherapy cycle with abnormal OCMI	3.5
Patient16	42	0	6	5	No recrudescence	Docetaxel+Carboplatin (1st-5th)	1st, 2nd	6
Patient17	46	0	1	8	No recrudescence	Paclitaxel+Carboplatin (1st-8th)	No chemotherapy cycle with abnormal OCMI	12
Patient18	51	0	6	9	Recrudescence (8th)	Paclitaxel+Carboplatin (1st-9th)	8th	12
Patient19	49	1	6	6	No recrudescence	Paclitaxel+Carboplatin (1st-6th)	No chemotherapy cycle with abnormal OCMI	12
Patient20	48	0	0	6	No recrudescence	Paclitaxel+Carboplatin (1st-6th)	No chemotherapy cycle with abnormal OCMI	12
Patient21	61	1	5	7	Recrudescence (6th)	Docetaxel+Carboplatin (1st-5th); Paclitaxel liposome+Carboplatin (6th); Bevacizumab+Epirubicin+Cyclophosphamide (7th)	1st, 3th, 5th, 6th, 7th	11.6
Patient22	47	1	1	6	No recrudescence	Docetaxel+Carboplatin (1st-6th)	No chemotherapy cycle with abnormal OCMI	8.3
Patient23	63	1	1	9	Recrudescence (7th)	Paclitaxel+Carboplatin (1st-9th)	No chemotherapy cycle with abnormal OCMI	12
Patient24	42	0	7	9	Recrudescence (7th)	Paclitaxel+Carboplatin (1st-9th)	7th, 8th	23.5
Patient25	58	1	3	3	No recrudescence	Paclitaxel+Carboplatin (1st-3th)	No chemotherapy cycle with abnormal OCMI	4
Patient26	46	0	0	4	No recrudescence	Paclitaxel+Carboplatin (1st-4th)	No chemotherapy cycle with abnormal OCMI	17.3
Patient27	50	1	3	6	No recrudescence	Paclitaxel+Carboplatin (1st-6th)	No chemotherapy cycle with abnormal OCMI	5.3
Patient28	50	0	0	4	No recrudescence	Docetaxel+Carboplatin (1st-4th)	No chemotherapy cycle with abnormal OCMI	4.6
Patient29	53	1	1	1	No recrudescence	Docetaxel+Carboplatin (1st)	No chemotherapy cycle with abnormal OCMI	4.7
Patient30	74	1	1	26	Recrudescence (11th)	Paclitaxel+Cisplatin (1st-2nd); Paclitaxel+Carboplatin (3th-26th)	1st-7th, 13th-15th, 17th-19th, 23th	67.4
Patient31	68	1	1	6	No recrudescence	Docetaxel+Carboplatin (1st-6th)	No chemotherapy cycle with abnormal OCMI	6.7
Patient32	46	0	7	6	No recrudescence	Docetaxel+Carboplatin (1st-2nd); Paclitaxel+Carboplatin (3th-26th)	No chemotherapy cycle with abnormal OCMI	5.6
Patient33	52	0	0	6	No recrudescence	Paclitaxel+Carboplatin (1st-6th)	No chemotherapy cycle with abnormal OCMI	7.7
Patient34	62	1	2	4	No recrudescence	Docetaxel+Carboplatin (1st-4th)	No chemotherapy cycle with abnormal OCMI	4.2
Patient35	61	1	8	3	No recrudescence	Luoplatinum L (1st); Docetaxel+Carboplatin (1st-3th)	1st, 2nd	4.1
Patient36	64	1	8	3	No recrudescence	Docetaxel+Carboplatin (1st-3th)	No chemotherapy cycle with abnormal OCMI	3.7
Patient37	57	1	5	18	Recrudescence (7th)	Paclitaxel+Carboplatin (1st); Docetaxel+Carboplatin (2nd-6th); Paclitaxel+Carboplatin (7th-18th)	1st, 5th-8th, 12th-14th	39.1
Patient38	49	1	1	8	Recrudescence (7th)	Paclitaxel+Carboplatin (1st-8th)	No chemotherapy cycle with abnormal OCMI	60.5
Patient39	45	0	7	7	Recrudescence (7th)	Paclitaxel+Carboplatin (1st-7th)	2nd	15.2
Patient40	62	1	6	20	Recrudescence (7th)	Paclitaxel+Carboplatin (1st-2nd); Docetaxel+Carboplatin (3th-6th); Paclitaxel+Carboplatin (7th-9th); Docetaxel+Carboplatin (10th-13th); Paclitaxel+Carboplatin (14th-20th)	1st, 10th, 11th	50.1
Patient41	47	0	7	3	No recrudescence	Docetaxel+Carboplatin (1st-3th)	No chemotherapy cycle with abnormal OCMI	3.2
