# Supplementary material for: Early identification of recurrence in ovarian cancer: a comparison between the ovarian cancer metastasis index and CA-125 levels
Source: PeerJ. 2018 Nov 7;6:e5912. doi: 10.7717/peerj.5912 (PMC6228545; doi:10.7717/peerj.5912)
Supplement: Table S2 [file peerj-06-5912-s003.xlsx]

## Sheet: Sheet1
Supplementary table 2. The dataset of ovarian cancer metastasis.
ID	Metastasis (0:no metastasis/1:metastasis)	Multi-organ metastasis (0:no multi-organ metastasis/1:multi-organ metastasis)	CA-125 (U/mL)	NNC	OCMI
Patient0001	0	0	593.2	0.630446	0.422843
Patient0002	0	0	245.6	0.177404	0.279728
Patient0003	0	0	681.2	0.65646	0.630944
Patient0004	0	0	19.1	0.173618	0.0879223
Patient0005	0	0	24.2	0.189254	0.216577
Patient0006	0	0	121	0.199301	0.106752
Patient0007	0	0	1137	0.611942	0.409277
Patient0008	0	0	297	0.562052	0.3727
Patient0009	0	0	272.5	0.199449	0.224051
Patient0010	0	0	312.7	0.61648	0.529795
Patient0011	0	0	771.9	0.458586	0.603066
Patient0012	0	0	848.3	0.566568	0.493202
Patient0013	0	0	1786	0.560316	0.488619
Patient0014	0	0	351.8	0.375457	0.54212
Patient0015	0	0	2282	0.640526	0.430233
Patient0016	0	0	615.9	0.667946	0.450336
Patient0017	0	0	223.1	0.564324	0.491557
Patient0018	0	0	1111	0.749963	0.627657
Patient0019	0	0	127.5	0.219166	0.238507
Patient0020	0	0	210.4	0.497228	0.442366
Patient0021	0	0	16.97	0.156065	0.075053
Patient0022	0	0	92.23	0.28091	0.283774
Patient0023	0	0	278.6	0.173274	0.2767
Patient0024	0	0	46.54	0.198384	0.22327
Patient0025	0	0	281.1	0.417287	0.266566
Patient0026	0	0	392.1	0.586125	0.69657
Patient0027	0	0	112.3	0.32948	0.319383
Patient0028	0	0	42.71	0.0639125	0.00749208
Patient0029	0	0	46.28	0.198072	0.223042
Patient0030	0	0	39.17	0.49456	0.323219
Patient0031	0	0	522.9	0.550249	0.670268
Patient0032	0	0	73.04	0.0997818	0.150981
Patient0033	0	0	11.92	0.230278	0.129462
Patient0034	0	0	2119	0.315787	0.381182
Patient0035	0	0	788.7	0.449616	0.407459
Patient0036	0	0	133.5	0.375915	0.542456
Patient0037	0	0	44.1	0.0927341	0.0286225
Patient0038	0	0	22.35	0.350777	0.217805
Patient0039	0	0	50.53	0.224411	0.431381
Patient0040	0	0	33.65	0.15554	0.0746685
Patient0041	0	0	29.87	0.287722	0.171577
Patient0042	0	0	14.42	0.223476	0.124475
Patient0043	0	0	47.7	0.129857	0.36206
Patient0044	0	0	216.8	0	0.266856
Patient0045	0	0	53.24	0.0789142	0.0184905
Patient0046	0	0	1754	0.598523	0.588468
Patient0047	0	0	15.08	0.27242	0.349388
Patient0048	0	0	1982	0.482716	0.314535
Patient0049	0	0	176.2	0.322801	0.314486
Patient0050	0	0	1281	0.633562	0.731348
Patient0051	0	0	741.6	0.736761	0.807008
Patient0052	0	0	44.89	0.19681	0.104925
Patient0053	0	0	632.8	0.470925	0.494921
Patient0054	0	0	68.35	0.288543	0.172179
Patient0055	0	0	1251	0.519519	0.458708
Patient0056	0	0	46.92	0.272327	0.34932
Patient0057	0	0	64.7	0.385049	0.242931
Patient0058	0	0	262.6	0.528079	0.464984
Patient0059	0	0	94.1	0.367625	0.230157
Patient0060	0	0	538.8	0.534464	0.469666
Patient0061	0	0	59.87	0.497803	0.442788
Patient0062	0	0	35.7	0.20017	0.22458
Patient0063	0	0	876.8	0.378789	0.427371
Patient0064	0	0	509.9	0.323406	0.50396
Patient0065	0	0	135.2	0.360453	0.224899
Patient0066	0	0	26	0.094242	0.029728
Patient0067	0	0	611.3	0.533561	0.540842
Patient0068	0	0	194.4	0.200835	0.296906
Patient0069	0	0	179.9	0.468191	0.421078
Patient0070	0	0	50.21	0.10129	0.152086
Patient0071	0	0	41.05	0.350192	0.406406
Patient0072	0	0	278.3	0.507954	0.45023
Patient0073	0	0	797.4	0.232009	0.247922
Patient0074	0	0	547.2	0.45261	0.409655
Patient0075	0	0	23	0.411788	0.379726
Patient0076	0	0	655.8	0.591464	0.511455
Patient0077	0	0	117.6	0.187894	0.21558
Patient0078	0	0	1438	0.24613	0.258275
Patient0079	0	0	246.7	0.543749	0.476473
Patient0080	0	0	21.55	0.182158	0.211374
Patient0081	0	0	39.14	0.409857	0.261119
Patient0082	0	0	99.43	0.176896	0.0903255
Patient0083	0	0	1594	0.580398	0.503342
Patient0084	0	0	64.75	0.291169	0.291295
Patient0085	0	0	163.2	0.450527	0.408127
Patient0086	0	0	1143	0.612236	0.715713
Patient0087	0	0	113.5	0.488537	0.318803
Patient0088	0	0	646	0.191385	0.100948
Patient0089	0	0	30.52	0.365891	0.346077
Patient0090	0	0	187	0.206677	0.112159
Patient0091	0	0	2581	0.547484	0.479211
Patient0092	0	0	144	0.253372	0.452615
Patient0093	0	0	72.1	0.0591758	0.121211
Patient0094	0	0	104.1	0.386607	0.361265
Patient0095	0	0	16.59	0.357478	0.222718
Patient0096	0	0	919.2	0.44565	0.287361
Patient0097	1	0	764.3	0.436116	0.586592
Patient0098	1	0	112.3	0.377186	0.354358
Patient0099	1	0	230.6	0.509579	0.640451
Patient0100	1	0	193.8	0.621768	0.416481
Patient0101	1	0	942.3	0.554876	0.556469
Patient0102	1	0	308.9	0.3209	0.502122
Patient0103	1	0	876.6	0.752439	0.512281
Patient0104	1	0	606.4	0.69472	0.776186
Patient0105	1	0	1144	0.601816	0.519044
Patient0106	1	0	21.51	0.305486	0.1846
Patient0107	1	0	122.8	0.17306	0.204705
Patient0108	1	0	670	0.837225	0.691632
Patient0109	1	0	1387	0.377369	0.426331
Patient0110	1	0	80.69	0.281109	0.166729
Patient0111	1	0	447	0.281316	0.35591
Patient0112	1	0	1819	0.652577	0.556259
Patient0113	1	0	716.9	0.530666	0.655911
Patient0114	1	0	1641	0.486717	0.43466
Patient0115	1	0	2168	0.616097	0.412323
Patient0116	1	0	779.3	0.435626	0.280011
Patient0117	1	0	193.9	0.493521	0.628678
Patient0118	1	0	820.6	0.667941	0.639361
Patient0119	1	0	1005	0.600233	0.706913
Patient0120	1	0	3637	0.697359	0.77812
Patient0121	1	0	25.73	0.352165	0.218822
Patient0122	1	0	694	0.432878	0.467026
Patient0123	1	0	17.61	0.0536934	0
Patient0124	1	0	1423	0.461366	0.416074
Patient0125	1	0	1454	0.461602	0.299056
Patient0126	1	0	3895	0.776108	0.835855
Patient0127	1	0	706.1	0.448511	0.289458
Patient0128	1	0	627.4	0.405689	0.375255
Patient0129	1	0	581.6	0.468513	0.493153
Patient0130	1	0	425.8	0.604396	0.709966
Patient0131	1	0	398.7	0.664414	0.564937
Patient0132	1	0	251.7	0.386832	0.244239
Patient0133	1	0	1247.7	0.416513	0.38319
Patient0134	1	0	988.2	0.707419	0.668304
Patient0135	1	0	101.3	0.32772	0.389931
Patient0136	1	0	637.4	0.483591	0.432368
Patient0137	1	0	375.6	0.483222	0.621128
Patient0138	1	0	264	0.419564	0.457266
Patient0139	1	0	808.2	0.475429	0.498223
Patient0140	1	0	440.7	0.526442	0.652814
Patient0141	1	0	1796	0.723282	0.797126
Patient0142	1	0	346.1	0.462377	0.416816
Patient0143	1	0	2688	0.642264	0.737728
Patient0144	1	0	250.9	0.285567	0.287188
Patient0145	1	0	192.4	0.255093	0.264846
Patient0146	1	0	398	0.346618	0.403786
Patient0147	1	0	1119	0.718713	0.793776
Patient0148	1	0	134.4	0.36611	0.535267
Patient0149	1	0	1512	0.54251	0.664594
Patient0150	1	0	71.31	0.546693	0.478631
Patient0151	1	0	129.3	0.271835	0.15993
Patient0152	1	0	374.8	0.52877	0.654521
Patient0153	1	0	678.3	0.708496	0.786286
Patient0154	1	0	2109	0.652709	0.745386
Patient0155	1	0	1600	0.483877	0.432578
Patient0156	1	0	1245	0.524057	0.533874
Patient0157	1	0	65.94	0.355149	0.221011
Patient0158	1	0	84.5	0.270635	0.15905
Patient0159	1	0	2055	0.568752	0.683833
Patient0160	1	0	103.9	0.174526	0.205779
Patient0161	1	0	1269	0.669722	0.757859
Patient0162	1	0	220.2	0.465953	0.491275
Patient0163	1	0	57.4	0.325779	0.388508
Patient0164	1	0	36.58	0.495155	0.323655
Patient0165	1	0	427.5	0.527348	0.464449
Patient0166	1	0	111.2	0.435056	0.396785
Patient0167	1	0	127	0.352117	0.218787
Patient0168	1	0	74.67	0.381349	0.429249
Patient0169	1	0	65.76	0.475219	0.426231
Patient0170	1	0	2376	0.546066	0.667201
Patient0171	1	0	347.1	0.298741	0.485876
Patient0172	1	0	22.72	0.435463	0.586113
Patient0173	1	0	142.1	0.0137675	0.27695
Patient0174	1	0	455.7	0.63971	0.618664
Patient0175	1	0	46.63	0.632314	0.730434
Patient0176	1	0	83.28	0.432638	0.395013
Patient0177	1	0	228.1	0.622699	0.723384
Patient0178	1	0	1200	0.635638	0.73287
Patient0179	1	0	3296	0.739454	0.502761
Patient0180	1	0	541	0.468501	0.421305
Patient0181	1	0	470	0.501384	0.634443
Patient0182	1	0	365.1	0.239908	0.136522
Patient0183	1	0	2932	0.704936	0.783676
Patient0184	1	0	147.2	0.202932	0.109413
Patient0185	1	0	352.4	0.604465	0.710016
Patient0186	1	0	88.23	0.351859	0.524819
Patient0187	1	0	260.2	0.336772	0.207537
Patient0188	1	0	2368	0.590956	0.582921
Patient0189	1	0	495.6	0.660843	0.751349
Patient0190	1	0	641.5	0.546925	0.55064
Patient0191	1	0	1070	0.752713	0.818703
Patient0192	1	0	215.6	0.28043	0.355261
Patient0193	1	0	374.9	0.589004	0.509651
Patient0194	1	0	173.7	0.301423	0.487843
Patient0195	1	0	3490	0.766499	0.82881
Patient0196	1	0	1196	0.56492	0.681024
Patient0197	1	0	662.1	0.356717	0.22216
Patient0198	1	0	183.2	0.408406	0.260056
Patient0199	1	0	26.32	0.266457	0.155986
Patient0200	1	0	146.3	0.1757	0.20664
Patient0201	1	0	1995	0.73359	0.804683
Patient0202	1	0	145.4	0.606119	0.405007
Patient0203	1	0	69.88	0.644313	0.433009
Patient0204	1	0	589	0.505967	0.520611
Patient0205	1	0	31.13	0.152025	0.189283
Patient0206	1	0	2014	0.572033	0.686238
Patient0207	1	0	2298	0.42714	0.580011
Patient0208	1	0	1000	0.651537	0.744527
Patient0209	1	0	1349	0.818449	0.866897
Patient0210	1	0	255.5	0.475606	0.426514
Patient0211	1	0	152.5	0.244101	0.256787
Patient0212	1	0	229.6	0.469825	0.422275
Patient0213	1	0	186.4	0.367172	0.347017
Patient0214	1	0	2449	0.690051	0.772763
Patient0215	1	0	438.9	0.269337	0.347127
Patient0216	1	0	1967	0.563915	0.680287
Patient0217	1	0	42.84	0.455615	0.411858
Patient0218	1	0	488.6	0.6135	0.71664
Patient0219	1	0	176.8	0.323445	0.503988
Patient0220	1	0	41.04	0.51659	0.645591
Patient0221	1	0	1247.7	0.598042	0.705307
Patient0222	1	0	1000	0.767079	0.523014
Patient0223	1	0	2506	0.538879	0.355711
Patient0224	1	0	172.4	0.193188	0.408491
Patient0225	1	0	106.7	0.351346	0.524443
Patient0226	1	0	73.68	0.321861	0.502826
Patient0227	1	0	343.5	0.642656	0.738016
Patient0228	1	0	103.7	0.368056	0.419502
Patient0229	1	0	728.2	0.46088	0.415718
Patient0230	1	0	1793	0.608398	0.7129
Patient0231	1	0	1863	0.716103	0.791863
Patient0232	1	0	1448	0.620904	0.722068
Patient0233	1	0	330.7	0.447605	0.405985
Patient0234	1	0	219.8	0.529871	0.655327
Patient0235	1	0	729.1	0.470687	0.611937
Patient0236	1	0	542.4	0.654829	0.55791
Patient0237	1	0	142	0.282186	0.473739
Patient0238	1	0	542.4	0.759593	0.634718
Patient0239	1	0	344.8	0.26279	0.270489
Patient0240	1	0	3900	0.758662	0.634035
Patient0241	1	0	260.7	0.524371	0.462266
Patient0242	1	0	204.5	0.222664	0.31291
Patient0243	1	0	28.75	0.492377	0.510648
Patient0244	1	0	4795	0.664172	0.75379
Patient0245	1	0	355.4	0.700086	0.59109
Patient0246	1	0	442.5	0.582136	0.387425
Patient0247	1	0	248.8	0.367776	0.230268
Patient0248	1	0	26.32	0.266457	0.155986
Patient0249	1	0	2651	0.499779	0.633266
Patient0250	1	0	2734	0.727086	0.682723
Patient0251	1	0	534	0.538447	0.661615
Patient0252	1	0	912.2	0.712433	0.789172
Patient0253	1	0	1998	0.426791	0.579755
Patient0254	1	0	1286	0.830858	0.875995
Patient0255	1	0	1096	0.615883	0.718387
Patient0256	1	0	2422	0.695141	0.776494
Patient0257	1	0	2238	0.710127	0.787481
Patient0258	1	0	436.6	0.594433	0.702661
Patient0259	1	0	3657	0.7308	0.802638
Patient0260	1	0	1451	0.745345	0.813302
Patient0261	1	0	1569	0.514159	0.643809
Patient0262	1	0	348.2	0.298457	0.179447
Patient0263	1	0	3898	0.828862	0.874532
Patient0264	1	0	328.6	0.522491	0.460887
Patient0265	1	0	2449	0.674591	0.644237
Patient0266	1	0	2037	0.755172	0.820506
Patient0267	1	1	67.23	0.200006	0.413489
Patient0268	1	1	186.9	0.57053	0.567945
Patient0269	1	1	300.3	0.560124	0.677508
Patient0270	1	1	2538	0.480471	0.61911
Patient0271	1	1	494.4	0.698968	0.59027
Patient0272	1	1	244.5	0.62975	0.728554
Patient0273	1	1	1096	0.685407	0.769358
Patient0274	1	1	262.1	0.42562	0.578896
Patient0275	1	1	421.4	0.496065	0.630543
Patient0276	1	1	108.5	0.348423	0.5223
Patient0277	1	1	425.3	0.584692	0.695519
Patient0278	1	1	777.8	0.379475	0.545066
Patient0279	1	1	1884	0.719622	0.677251
Patient0280	1	1	1358	0.584551	0.506387
Patient0281	1	1	194	0.606185	0.711277
Patient0282	1	1	230.4	0.364673	0.417023
Patient0283	1	1	30.23	0.328092	0.201174
Patient0284	1	1	34.99	0.329714	0.391393
Patient0285	1	1	819.5	0.56547	0.492397
Patient0286	1	1	1242	0.539717	0.662547
Patient0287	1	1	740	0.600834	0.518324
Patient0288	1	1	296.8	0.571519	0.379641
Patient0289	1	1	2535	0.592474	0.584033
Patient0290	1	1	725.4	0.494686	0.512341
Patient0291	1	1	681.2	0.669395	0.757619
Patient0292	1	1	1381	0.657074	0.748586
Patient0293	1	1	1846	0.721044	0.795485
Patient0294	1	1	2023	0.691929	0.58511
Patient0295	1	1	440.3	0.449982	0.596757
Patient0296	1	1	396.6	0.471591	0.6126
Patient0297	1	1	457.9	0.493836	0.628909
Patient0298	1	1	1538	0.505151	0.637204
Patient0299	1	1	1243	0.577059	0.689923
Patient0300	1	1	1976	0.582826	0.694152
Patient0301	1	1	2883	0.786847	0.843728
Patient0302	1	1	2674	0.519078	0.647415
Patient0303	1	1	1015	0.801055	0.854144
Patient0304	1	1	65.82	0.398327	0.558887
Patient0305	1	1	234	0.523806	0.650881
Patient0306	1	1	4732	0.743938	0.81227
Patient0307	1	1	338.8	0.427602	0.58035
Patient0308	1	1	1507	0.580383	0.69236
Patient0309	1	1	109.5	0.349564	0.523137
Patient0310	1	1	2343	0.583593	0.694713
Patient0311	1	1	1828	0.701014	0.780801
Patient0312	1	1	1610	0.603375	0.709217
Patient0313	1	1	305.1	0.73931	0.808877
Patient0314	1	1	314.7	0.610619	0.714528
Patient0315	1	1	321.1	0.652734	0.745404
Patient0316	1	1	94.99	0.3717	0.539366
Patient0317	1	1	1247.7	0.737324	0.807421
Patient0318	1	1	649.3	0.481442	0.430793
Patient0319	1	1	395.9	0.521094	0.648893
Patient0320	1	1	2079	0.619485	0.531998
Patient0321	1	1	285.9	0.650738	0.74394
Patient0322	1	1	1425	0.774393	0.717406
Patient0323	1	1	108.3	0.342197	0.400545
Patient0324	1	1	319.1	0.539625	0.662479
Patient0325	1	1	3981	0.934865	0.952246
Patient0326	1	1	295.3	0.451434	0.291601
Patient0327	1	1	437.3	0.471757	0.612722
Patient0328	1	1	734.3	0.589737	0.699218
Patient0329	1	1	4592	0.807774	0.670041
Patient0330	1	1	2944	0.706458	0.784792
Patient0331	1	1	1430	0.899539	0.620127
Patient0332	1	1	1182	0.575775	0.382761
Patient0333	1	1	2608	0.538675	0.355561
Patient0334	1	1	864.1	0.487599	0.624337
Patient0335	1	1	687.3	0.470894	0.612089
Patient0336	1	1	401	0.765111	0.710601
Patient0337	1	1	1146	0.591848	0.700766
Patient0338	1	1	240.6	0.622493	0.723233
Patient0339	1	1	607.2	0.920957	0.635829
Patient0340	1	1	1812	0.778753	0.648765
Patient0341	1	1	394.3	0.553456	0.672619
Patient0342	1	1	23.04	0.353213	0.525812
Patient0343	1	1	3278	0.740349	0.620608
Patient0344	1	1	2162	0.633511	0.731311
Patient0345	1	1	602.8	0.590674	0.699905
Patient0346	1	1	782.7	0.483161	0.621083
Patient0347	1	1	1987	0.705588	0.784154
Patient0348	1	1	23.3	0.329087	0.319095
Patient0349	1	1	2211	0.64478	0.739572
Patient0350	1	1	547.8	0.736904	0.807113
Patient0351	1	1	2302	0.712046	0.788888
Patient0352	1	1	1290	0.607953	0.712573
Patient0353	1	1	797	0.57173	0.686016
Patient0354	1	1	1112	0.700595	0.780493
Patient0355	1	1	2597	0.647395	0.624299
Patient0356	1	1	620	0.568468	0.494596
Patient0357	1	1	26.47	0.383987	0.431183
Patient0358	1	1	1816	0.684217	0.768486
Patient0359	1	1	676.5	0.419742	0.574588
Patient0360	1	1	387.3	0.719595	0.794423
Patient0361	1	1	2607	0.822034	0.869525
Patient0362	1	1	1522	0.531371	0.656427
Patient0363	1	1	462	0.356003	0.410666
Patient0364	1	1	2333	0.743025	0.811601
Patient0365	1	1	2833	0.770048	0.831412
Patient0366	1	1	1402	0.623682	0.606913
Patient0367	1	1	783.2	0.738911	0.808584
Patient0368	1	1	1677	0.665686	0.7549
Patient0369	1	1	633.5	0.702973	0.782237
Patient0370	1	1	1226	0.565851	0.681706
Patient0371	1	1	2763	0.650234	0.743571
Patient0372	1	1	251.8	0.611468	0.71515
Patient0373	1	1	942.9	0.448111	0.289165
Patient0374	1	1	3167	0.743618	0.812035
Patient0375	1	1	534	0.465844	0.419357
Patient0376	1	1	232.1	0.394912	0.250162
Patient0377	1	1	1170	0.594155	0.702457
Patient0378	1	1	371.4	0.467784	0.609809
Patient0379	1	1	1240	0.714778	0.6737
Patient0380	1	1	618.2	0.706575	0.595847
Patient0381	1	1	1066	0.692301	0.774412
Patient0382	1	1	1161	0.625123	0.725161
Patient0383	1	1	4253	0.789589	0.845739
Patient0384	1	1	238.3	0.455131	0.600533
Patient0385	1	1	4454	0.724237	0.680635
Patient0386	1	1	435.5	0.63492	0.732344
Patient0387	1	1	1544	0.742824	0.811453
Patient0388	1	1	4739	0.715669	0.602514
Patient0389	1	1	417.5	0.767025	0.829196
Patient0390	1	1	357	0.565549	0.564293
Patient0391	1	1	3221	0.749409	0.816281
Patient0392	1	1	390.7	0.586143	0.696583
Patient0393	1	1	1247.7	0.731836	0.803397
Patient0394	1	1	1144	0.774716	0.834834
Patient0395	1	1	543.7	0.512779	0.642797
Patient0396	1	1	93.06	0.642333	0.431557
Patient0397	1	1	1259	0.685306	0.652093
Patient0398	1	1	1034	0.653183	0.745733
Patient0399	1	1	3158	0.789	0.845307
Patient0400	1	1	430	0.488279	0.435805
Patient0401	1	1	397.9	0.679184	0.764795
Patient0402	1	1	1706	0.709451	0.786986
Patient0403	1	1	3937	0.771924	0.832787
Patient0404	1	1	1029	0.721823	0.796057
Patient0405	1	1	665.9	0.590582	0.699837
Patient0406	1	1	397.4	0.726456	0.799453
Patient0407	1	1	843.6	0.670615	0.758513
Patient0408	1	1	453.6	0.570499	0.685114
Patient0409	1	1	1084	0.621774	0.533676
Patient0410	1	1	342.7	0.624005	0.724341
Patient0411	1	1	1218	0.7265	0.799485
Patient0412	1	1	641.8	0.455914	0.601107
Patient0413	1	1	575	0.758323	0.822816
Patient0414	1	1	562.7	0.509151	0.640137
Patient0415	1	1	282.8	0.317804	0.499852
Patient0416	1	1	2219	0.780872	0.839348
Patient0417	1	1	215.4	0.371884	0.539501
Patient0418	1	1	31.93	0.671494	0.570128
Patient0419	1	1	2453	0.775396	0.835333
Patient0420	1	1	911.1	0.544504	0.666056
Patient0421	1	1	2927	0.604808	0.710267
Patient0422	1	1	1617	0.836958	0.880467
Patient0423	1	1	1042	0.687164	0.770646
Patient0424	1	1	1333	0.667258	0.567023
Patient0425	1	1	156.1	0.416176	0.571973
Patient0426	1	1	873.4	0.630089	0.728802
Patient0427	1	1	3683	0.730777	0.802621
Patient0428	1	1	129.9	0.479276	0.618235
Patient0429	1	1	834	0.495007	0.629768
Patient0430	1	1	393.3	0.484458	0.622034
Patient0431	1	1	353.6	0.706405	0.784753
Patient0432	1	1	1890	0.689501	0.77236
Patient0433	1	1	663.5	0.851516	0.89114
Patient0434	1	1	2661	0.664236	0.636645
Patient0435	1	1	2145	0.714297	0.673347
Patient0436	1	1	1182	0.630895	0.729393
Patient0437	1	1	2130	0.719858	0.794616
Patient0438	1	1	586	0.761623	0.825235
Patient0439	1	1	2367	0.537524	0.543748
Patient0440	1	1	814.4	0.448447	0.595632
Patient0441	1	1	1500	0.50289	0.635547
Patient0442	1	1	748.4	0.752217	0.818339
Patient0443	1	1	2247	0.860377	0.780445
Patient0444	1	1	1794	0.717569	0.603908
Patient0445	1	1	723.1	0.455603	0.600879
Patient0446	1	1	247	0.390261	0.552973
Patient0447	1	1	4310	1	1
Patient0448	1	1	852.6	0.751706	0.817965
Patient0449	1	1	2957	0.764224	0.827142
Patient0450	1	1	201.4	0.396426	0.557493
Patient0451	1	1	2789	0.731111	0.802865
Patient0452	1	1	94.95	0.233105	0.437756
Patient0453	1	1	2804	0.684235	0.768498
Patient0454	1	1	1913	0.669351	0.757587
Patient0455	1	1	1048	0.814554	0.864042
Patient0456	1	1	400.5	0.615578	0.718163
Patient0457	1	1	1000	0.683938	0.768281
Patient0458	1	1	4110	0.733388	0.804535
Patient0459	1	1	44.99	0.497869	0.631865
Patient0460	1	1	3895	0.743864	0.812215
Patient0461	1	1	699	0.668793	0.568148
Patient0462	1	1	3701	0.849527	0.700652
Patient0463	1	1	551.9	0.675017	0.572711
Patient0464	1	1	4574	0.704245	0.783169
Patient0465	1	1	801.8	0.485006	0.622435
Patient0466	1	1	1049	0.657443	0.748857
Patient0467	1	1	1763	0.532211	0.657043
Patient0468	1	1	629.3	0.554185	0.673154
Patient0469	1	1	893.1	0.696642	0.777595
Patient0470	1	1	1391	0.698681	0.77909
Patient0471	1	1	1566	0.649695	0.743176
Patient0472	1	1	1056	0.69243	0.468286
Patient0473	1	1	3724	0.771067	0.832159
Patient0474	1	1	463.8	0.631748	0.730018
Patient0475	1	1	3884	0.79032	0.846275
Patient0476	1	1	1787	0.674379	0.761273
Patient0477	1	1	2034	0.729067	0.801367
Patient0478	1	1	3214	0.714865	0.790955
Patient0479	1	1	4647	0.705705	0.78424
Patient0480	1	1	2891	0.743851	0.812206
Patient0481	1	1	1730	0.764469	0.827322
Patient0482	1	1	1247	0.794581	0.660369
Patient0483	1	1	299.3	0.46936	0.610965
Patient0484	1	1	950.3	0.569287	0.684226
Patient0485	1	1	784	0.924802	0.827678
Patient0486	1	1	1225	0.703938	0.782944
Patient0487	1	1	132.4	0.608936	0.713294
Patient0488	1	1	380.6	0.531533	0.656546
Patient0489	1	1	1146	0.708202	0.59704
Patient0490	1	1	557.6	0.475277	0.498111
Patient0491	1	1	476	0.584844	0.695631
Patient0492	1	1	3921	0.75247	0.818525
Patient0493	1	1	3147	0.654033	0.746357
Patient0494	1	1	447.5	0.841417	0.883736
Patient0495	1	1	442.8	0.626405	0.726101
Patient0496	1	1	2935	0.684747	0.768874
Patient0497	1	1	3686	0.766092	0.828512
Patient0498	1	1	3694	0.76407	0.827029
Patient0499	1	1	718.5	0.487693	0.435375
Patient0500	1	1	1964	0.58519	0.578693
Patient0501	1	1	1065	0.75734	0.822095
Patient0502	1	1	201.8	0.575719	0.688941
Patient0503	1	1	3098	0.747819	0.815115
Patient0504	1	1	4914	0.791433	0.84709
Patient0505	1	1	999.9	0.644384	0.739283
Patient0506	1	1	1700	0.725488	0.798743
Patient0507	1	1	1718	0.617127	0.719299
Patient0508	1	1	1758	0.784479	0.841992
Patient0509	1	1	553.4	0.511637	0.641959
Patient0510	1	1	1247.7	0.522997	0.461259
Patient0511	1	1	4613	0.599672	0.517472
Patient0512	1	1	129.2	0.347671	0.521749
Patient0513	1	1	411.2	0.707483	0.785543
Patient0514	1	1	564.4	0.789175	0.845435
Patient0515	1	1	392.9	0.629764	0.728564
Patient0516	1	1	564.5	0.781998	0.840173
Patient0517	1	1	278.3	0.669535	0.757722
Patient0518	1	1	1764	0.593472	0.701956
Patient0519	1	1	963.9	0.702505	0.781893
Patient0520	1	1	251.7	0.663395	0.75322
Patient0521	1	1	254.2	0.561417	0.678456
Patient0522	1	1	380	0.769405	0.830941
Patient0523	1	1	281.4	0.49428	0.629235
Patient0524	1	1	1611	0.508421	0.639602
Patient0525	1	1	830.9	0.586377	0.507725
Patient0526	1	1	421	0.56153	0.678538
Patient0527	1	1	1115	0.614605	0.71745
Patient0528	1	1	1904	0.627773	0.727104
Patient0529	1	1	3894	0.767996	0.829907
Patient0530	1	1	530.3	0.576856	0.689775
Patient0531	1	1	568.1	0.914127	0.937042
Patient0532	1	1	1034	0.72724	0.800027
Patient0533	1	1	2380	0.974913	0.981608
Patient0534	1	1	801.8	0.719152	0.794098
